# Supplementary material
Source: Springer Nature journal article supplement (https://www.springermedizin.de/resource/supplementary/13195_2014_192_MOESM2_ESM.pdf/9688452)

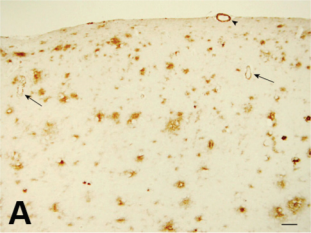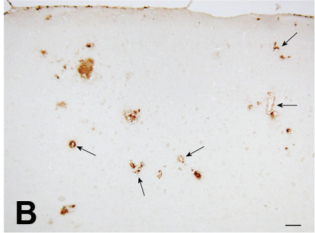

Supplement: MOESM2 [file 9688452]
